# Supplementary material
Source: PubMed Central journal article supplement (PMC2967822)
Supplement: Supp_Table.pdf [file Supp_Table.pdf]

SUPPLEMENTARY TABLE 1. PRELIMINARY ANALYSES FOR GLOBAL FUNCTIONAL OUTCOMES AND BCL2 tSNPs

| SNP        | Genotype | n   | GOS                                                             |       |           | DRS                                                                  |           |           | df   | coeff | Odds ratio | 95% Wald confidence limits | p     |
|------------|----------|-----|-----------------------------------------------------------------|-------|-----------|----------------------------------------------------------------------|-----------|-----------|------|-------|------------|----------------------------|-------|
|            |          |     | coeff                                                           | p     |           | coeff                                                                | p         |           |      |       |            |                            |       |
|            |          |     | Preliminary mixed models (over time at 3, 6, 1,2 and 24 months) |       |           | Preliminary binary logistic regression (cross-sectional at 3 months) |           |           |      |       |            |                            |       |
| rs1026825  | AA       | 205 | 0.05                                                            | 0.81  | -0.24     | 0.91                                                                 | 1         | 0.14      | 1.27 | 0.59  | 2.77       | 0.59                       |       |
|            | GG       |     | -0.09                                                           | 0.70  | 1.30      | 0.56                                                                 | 1         | -0.03     |      |       |            |                            | 0.91  |
|            | AG       |     | reference                                                       |       | reference |                                                                      |           | reference |      |       |            |                            | 0.83  |
| rs12454712 | overall  | 204 | -0.09                                                           | 0.86  | 0.69      | 0.79                                                                 | 1         | -0.11     | 0.81 | 0.39  | 1.66       | 0.56                       |       |
|            | GG & AG  |     |                                                                 | 0.69  | 0.73      | 1                                                                    |           |           |      |       |            |                            | 0.56  |
|            | AA       |     |                                                                 |       |           |                                                                      |           |           |      |       |            |                            | 0.79  |
| rs12968517 | CC       | 204 | -0.44                                                           | 0.15* | 3.45      | 0.23                                                                 | 1         | 0.19      | 1.43 | 0.51  | 4.03       | 0.55                       |       |
|            | TT       |     | -0.05                                                           | 0.80  | 0.68      | 0.72                                                                 | 1         | -0.03     |      |       |            |                            | 0.91  |
|            | CT       |     | reference                                                       |       | reference |                                                                      | reference |           |      |       |            |                            | 0.79  |
| rs1381548  | overall  | 197 | -0.06                                                           | 0.33  | 0.17      | 0.48                                                                 | 1         | -0.02     | 0.95 | 0.49  | 1.87       | 0.89                       |       |
|            | CC & CT  |     |                                                                 | 0.17  | 0.92      | 1                                                                    |           |           |      |       |            |                            | 0.89  |
|            | TT       |     |                                                                 |       |           |                                                                      |           |           |      |       |            |                            | 0.89  |
| rs1481031  | CC       | 204 | 0.03                                                            | 0.88  | -0.86     | 0.66                                                                 | 1         | -0.36     | 0.86 | 0.40  | 1.83       | 0.13#                      |       |
|            | TT       |     | -0.57                                                           | 0.04* | 4.94      | 0.06*                                                                | 1         | 0.57      |      |       |            |                            | 0.04# |
|            | CT       |     | reference                                                       |       | reference |                                                                      | reference |           |      |       |            |                            | 0.12# |
| rs17756073 | overall  | 202 | -0.19                                                           | 0.08* | 2.26      | 0.07*                                                                | 1         | 0.20      | 1.48 | 0.74  | 2.96       | 0.27#                      |       |
|            | TT & CT  |     |                                                                 | 2.26  | 0.21      | 1                                                                    |           |           |      |       |            |                            | 0.27# |
|            | CC       |     |                                                                 |       |           |                                                                      |           |           |      |       |            |                            | 0.27# |
| rs17759659 | AA       | 197 | -0.22                                                           | 0.41  | 1.85      | 0.45                                                                 | 1         | 0.20      | 1.47 | 0.57  | 3.76       | 0.50                       |       |
|            | GG       |     | 0.01                                                            | 0.97  | -0.32     | 0.88                                                                 | 1         | -0.02     |      |       |            |                            | 0.94  |
|            | AG       |     | reference                                                       |       | reference |                                                                      | reference |           |      |       |            |                            | 0.72  |
| rs17756073 | overall  | 202 | -0.07                                                           | 0.66  | 0.86      | 0.68                                                                 | 1         | -0.03     | 0.94 | 0.47  | 1.90       | 0.87                       |       |
|            | AA & AG  |     |                                                                 | 0.86  | 0.65      | 1                                                                    |           |           |      |       |            |                            | 0.87  |
|            | GG       |     |                                                                 |       |           |                                                                      |           |           |      |       |            |                            | 0.87  |
| rs17756073 | AA       | 197 | -0.28                                                           | 0.17* | 2.21      | 0.24                                                                 | 1         | 0.24      | 1.08 | 0.54  | 2.18       | 0.39                       |       |
|            | GG       |     | 0.19                                                            | 0.56  | -1.37     | 0.67                                                                 | 1         | -0.40     |      |       |            |                            | 0.36  |
|            | AG       |     | reference                                                       |       | reference |                                                                      | reference |           |      |       |            |                            | 0.64  |
| rs17756073 | overall  | 201 | 0.31                                                            | 0.23  | -2.45     | 0.36                                                                 | 1         | -0.09     | 0.84 | 0.43  | 1.65       | 0.62                       |       |
|            | GG & AG  |     |                                                                 | -2.45 | 0.17*     | 1                                                                    |           |           |      |       |            |                            | 0.62  |
|            | AA       |     |                                                                 |       |           |                                                                      |           |           |      |       |            |                            | 0.62  |
| rs17756073 | AA       | 197 | -0.14                                                           | 0.51  | 2.22      | 0.25                                                                 | 1         | 0.03      | 1.62 | 0.74  | 3.55       | 0.90                       |       |
|            | GG       |     | -0.55                                                           | 0.08* | 5.63      | 0.05*                                                                | 1         | 0.42      |      |       |            |                            | 0.17# |
|            | AG       |     | reference                                                       |       | reference |                                                                      | reference |           |      |       |            |                            | 0.23# |
| rs17756073 | overall  | 201 | 0.00                                                            | 0.22  | -0.71     | 0.13*                                                                | 1         | -0.10     | 0.82 | 0.42  | 1.62       | 0.57                       |       |
|            | GG & AG  |     |                                                                 | -0.71 | 0.69      | 1                                                                    |           |           |      |       |            |                            | 0.57  |
|            | AA       |     |                                                                 |       |           |                                                                      |           |           |      |       |            |                            | 0.57  |
| rs17756073 | AA       | 201 | 0.43                                                            | 0.04* | -4.42     | 0.02*                                                                | 1         | -0.44     | 0.49 | 0.22  | 1.09       | 0.11#                      |       |
|            | GG       |     | -0.12                                                           | 0.67  | -0.16     | 0.95                                                                 | 1         | 0.17      |      |       |            |                            | 0.60  |
|            | AG       |     | reference                                                       |       | reference |                                                                      | reference |           |      |       |            |                            | 0.21# |

(continued)

SUPPLEMENTARY TABLE 1. CONTINUED

| SNP       | Preliminary mixed models (over time at 3, 6, 1,2 and 24 months) |           |           |           | Preliminary binary logistic regression (cross-sectional at 3 months) |    |           |            |                            |      |       |
|-----------|-----------------------------------------------------------------|-----------|-----------|-----------|----------------------------------------------------------------------|----|-----------|------------|----------------------------|------|-------|
|           | GOS                                                             |           | DRS       |           | Genotype                                                             | df | coeff     | Odds ratio | 95% Wald confidence limits | p    |       |
|           | coeff                                                           | p         | coeff     | p         |                                                                      |    |           |            |                            |      |       |
|           | overall                                                         | 0.07*     | 0.06*     |           | overall                                                              | 1  | 0.34      | 1.98       | 0.92                       | 4.26 | 0.08# |
|           | GG & AG                                                         | -0.46     | 0.02*     | 4.39      | GG & AG                                                              |    |           |            |                            |      |       |
|           | AA                                                              |           |           |           | AA                                                                   |    |           |            |                            |      |       |
| rs1801018 | AA                                                              | 0.42      | 0.09*     | -4.71     | AA                                                                   | 1  | -0.14     | 0.63       | 0.25                       | 1.55 | 0.64  |
|           | GG                                                              | 0.40      | 0.07*     | -4.93     | GG                                                                   | 1  | -0.19     | 0.59       | 0.27                       | 1.30 | 0.47  |
|           | AG                                                              | reference | reference | reference | AG                                                                   |    | reference |            |                            |      | 0.34  |
|           | overall                                                         | 0.11*     | 0.03*     |           | overall                                                              |    |           |            |                            |      |       |
|           | AA & AG                                                         | -0.26     | 0.20*     | 3.39      | AA & AG                                                              | 1  | 0.20      | 1.48       | 0.70                       | 3.13 | 0.30# |
|           | GG                                                              |           |           |           | GG                                                                   |    |           |            |                            |      |       |
| rs1944419 | AA                                                              | -0.31     | 0.18*     | 3.10      | AA                                                                   | 1  | 0.11      | 1.36       | 0.59                       | 3.11 | 0.69  |
|           | TT                                                              | 0.07      | 0.78      | 0.01      | TT                                                                   | 1  | 0.09      | 1.33       | 0.57                       | 3.12 | 0.75  |
|           | AT                                                              | reference | reference | reference | AT                                                                   |    | reference |            |                            |      | 0.71  |
|           | overall                                                         | 0.31      | 0.33      |           | overall                                                              |    |           |            |                            |      |       |
|           | TT & AT                                                         | 0.34      | 0.13*     | -3.10     | AA & AT                                                              | 1  | -0.11     | 0.81       | 0.37                       | 1.76 | 0.59  |
|           | AA                                                              |           |           |           | TT                                                                   |    |           |            |                            |      |       |
| rs3810027 | CC                                                              | 0.13      | 0.54      | -1.00     | CC                                                                   | 1  | -0.19     | 0.77       | 0.37                       | 1.58 | 0.47  |
|           | GG                                                              | 0.01      | 0.97      | -0.67     | GG                                                                   | 1  | 0.11      | 1.03       | 0.36                       | 2.97 | 0.76  |
|           | CG                                                              | reference | reference | reference | CG                                                                   |    | reference |            |                            |      | 0.74  |
|           | overall                                                         | 0.81      | 0.87      |           | overall                                                              |    |           |            |                            |      |       |
|           | GG & CG                                                         | -0.13     | 0.52      | 0.86      | GG & CG                                                              | 1  | 0.14      | 1.31       | 0.66                       | 2.62 | 0.44  |
|           | CC                                                              |           |           |           | CC                                                                   |    |           |            |                            |      |       |
| rs4456611 | CC                                                              | -0.13     | 0.57      | 2.17      | CC                                                                   | 1  | 0.05      | 1.47       | 0.64                       | 3.35 | 0.85  |
|           | TT                                                              | -0.33     | 0.19*     | 3.00      | TT                                                                   | 1  | 0.29      | 1.86       | 0.82                       | 4.25 | 0.27# |
|           | CT                                                              | reference | reference | reference | CT                                                                   |    | reference |            |                            |      | 0.32  |
|           | overall                                                         | 0.41      | 0.35      |           | overall                                                              |    |           |            |                            |      |       |
|           | TT & CT                                                         | 0.03      | 0.89      | -1.18     | TT & CT                                                              | 1  | -0.08     | 0.86       | 0.40                       | 1.82 | 0.69  |
|           | CC                                                              |           |           |           | CC                                                                   |    |           |            |                            |      |       |
| rs4941185 | AA                                                              | -0.32     | 0.15*     | 2.50      | AA                                                                   | 1  | 0.08      | 1.74       | 0.79                       | 3.81 | 0.74  |
|           | GG                                                              | -0.57     | 0.03*     | 5.96      | GG                                                                   | 1  | 0.39      | 2.37       | 0.99                       | 5.66 | 0.14# |
|           | AG                                                              | reference | reference | reference | AG                                                                   |    | reference |            |                            |      | 0.13# |
|           | overall                                                         | 0.07*     | 0.04*     |           | overall                                                              |    |           |            |                            |      |       |
|           | GG & AG                                                         | 0.14      | 0.50      | -0.59     | GG & AG                                                              | 1  | -0.13     | 0.78       | 0.39                       | 1.57 | 0.48  |
|           | AA                                                              |           |           |           | AA                                                                   |    |           |            |                            |      |       |
| rs7230970 | CC                                                              | 0.05      | 0.86      | -1.59     | CC                                                                   | 1  | -0.60     | 0.33       | 0.12                       | 0.97 | 0.08# |
|           | TT                                                              | 0.12      | 0.60      | -1.26     | TT                                                                   | 1  | 0.11      | 0.68       | 0.32                       | 1.44 | 0.68  |
|           | CT                                                              | reference | reference | reference | CT                                                                   |    | reference |            |                            |      | 0.12# |
|           | overall                                                         | 0.87      | 0.75      |           | overall                                                              |    |           |            |                            |      |       |
|           | CC & TT                                                         | -0.10     | 0.62      | 0.76      | CC & TT                                                              | 1  | 0.04      | 1.09       | 0.54                       | 2.22 | 0.81  |
|           | TT                                                              |           |           |           | TT                                                                   |    |           |            |                            |      |       |

|           |         |     |           |       |           |         |         |   |           |      |      |      |                    |
|-----------|---------|-----|-----------|-------|-----------|---------|---------|---|-----------|------|------|------|--------------------|
| rs7236090 | CC      | 197 | -0.16     | 0.48  | 2.25      | 0.27    | CC      | 1 | 0.77      | 1.88 | 0.89 | 3.95 | 0.005 <sup>#</sup> |
|           | TT      |     | 0.56      | 0.03* | -6.24     | 0.01*   | TT      | 1 | -0.90     | 0.35 | 0.11 | 1.11 | 0.02 <sup>#</sup>  |
|           | CT      |     | reference |       | reference |         | CT      |   | reference |      |      |      | 0.02 <sup>#</sup>  |
|           | overall |     | 0.32      | 0.03* | -4.03     | 0.004   | overall | 1 | -0.44     | 0.41 | 0.20 | 0.84 | 0.01 <sup>#</sup>  |
| TT & CT   |         |     |           |       | 0.04*     | TT & CT |         |   |           |      |      |      |                    |
| CC        |         |     |           |       |           | CC      |         |   |           |      |      |      |                    |
| rs8083946 | AA      | 204 | 0.19      | 0.49  | -1.91     | 0.45    | AA      | 1 | -0.18     | 0.78 | 0.29 | 2.09 | 0.56               |
|           | GG      |     | 0.11      | 0.61  | -0.16     | 0.94    | GG      | 1 | 0.12      | 1.06 | 0.51 | 2.18 | 0.63               |
|           | AG      |     | reference |       | reference |         | AG      |   | reference |      |      |      | 0.84               |
|           | overall |     | -0.05     | 0.76  | -0.42     | 0.73    | overall | 1 | -0.06     | 0.88 | 0.45 | 1.73 | 0.72               |
|           | AA & AG |     |           | 0.79  |           | 0.82    | AA & AG |   |           |      |      |      |                    |
|           | GG      |     |           |       |           |         | GG      |   |           |      |      |      |                    |
| rs899968  | AA      | 199 | -0.22     | 0.39  | 2.02      | 0.42    | AA      | 1 | 0.31      | 1.91 | 0.77 | 4.73 | 0.27 <sup>#</sup>  |
|           | CC      |     | -0.18     | 0.40  | 1.69      | 0.40    | CC      | 1 | 0.02      | 1.43 | 0.66 | 3.10 | 0.92               |
|           | AC      |     | reference |       | reference |         | AC      |   | reference |      |      |      | 0.36               |
|           | overall |     | 0.11      | 0.59  | -1.06     | 0.61    | overall | 1 | -0.07     | 0.87 | 0.43 | 1.74 | 0.69               |
|           | AA & AC |     |           | 0.57  |           | 0.57    | AA & AC |   |           |      |      |      |                    |
|           | CC      |     |           |       |           |         | CC      |   |           |      |      |      |                    |
| rs949037  | CC      | 198 | 0.35      | 0.15* | -4.04     | 0.08*   | CC      | 1 | -0.29     | 0.76 | 0.30 | 1.92 | 0.32               |
|           | TT      |     | -0.07     | 0.77  | 0.16      | 0.94    | TT      | 1 | 0.32      | 1.40 | 0.65 | 3.01 | 0.21 <sup>#</sup>  |
|           | CT      |     | reference |       | reference |         | CT      |   | reference |      |      |      | 0.44               |
|           | overall |     | 0.19      | 0.24  | -1.54     | 0.16*   | overall | 1 | -0.21     | 0.66 | 0.32 | 1.34 | 0.25 <sup>#</sup>  |
| CC & CT   |         |     | 0.36      |       | 0.42      | CC & CT |         |   |           |      |      |      |                    |
| TT        |         |     |           |       |           | TT      |         |   |           |      |      |      |                    |

\* $p \leq .2$

<sup>#</sup> $p \leq .3$

Overall =  $p$  for type 3 test.  
tSNP, tagging single nucleotide polymorphism; GOS, Glasgow Outcome Scale; DRS, Disability Rating Scale.

SUPPLEMENTARY TABLE 2. PRELIMINARY MIXED MODELS ANALYSIS FOR COGNITIVE-BEHAVORAL OUTCOMES AND *BCL2* tSNPs

SUPPLEMENTARY TABLE 2. CONTINUED

| NRS-R      |          |                 |              |          | NRS-R      |          |                 |              |          |
|------------|----------|-----------------|--------------|----------|------------|----------|-----------------|--------------|----------|
| <i>SNP</i> | <i>n</i> | <i>Genotype</i> | <i>coeff</i> | <i>P</i> | <i>SNP</i> | <i>n</i> | <i>Genotype</i> | <i>coeff</i> | <i>P</i> |
| rs1026825  | 100      | AA              | -3.30        | 0.15*    | rs3810027  | 99       | CC              | 2.47         | 0.21     |
|            |          | GG              | -0.72        | 0.76     |            |          | GG              | 2.99         | 0.33     |
|            |          | AG              | reference    |          |            |          | CG              | reference    |          |
|            |          | overall         |              | 0.34     |            |          | overall         |              | 0.38     |
|            |          | AA & AG         | 3.06         | 0.15*    |            |          | GG & CG         | -1.86        | 0.32     |
| rs12454712 | 100      | GG              |              |          | rs4456611  | 95       | CC              | -1.93        | 0.44     |
|            |          | CC              | 3.02         | 0.36     |            |          | TT              | 2.83         | 0.23     |
|            |          | TT              | -3.59        | 0.07*    |            |          | CT              | reference    |          |
|            |          | CT              | reference    |          |            |          | overall         |              | 0.26     |
|            |          | overall         |              | 0.06*    |            |          | CC & CT         | -3.32        | 0.15*    |
| rs12968517 | 100      | CC & CT         | 4.13         | 0.03*    | rs4941185  | 96       | AA              | 0.67         | 0.77     |
|            |          | TT              |              |          |            |          | GG              | -1.94        | 0.48     |
|            |          | CC              | -0.87        | 0.67     |            |          | AG              | reference    |          |
|            |          | TT              | 0.54         | 0.86     |            |          | overall         |              | 0.68     |
|            |          | CT              | reference    |          |            |          | GG & AG         | -1.14        | 0.60     |
| rs1381548  | 94       | overall         |              | 0.86     | rs7230970  | 90       | AA              |              |          |
|            |          | TT & CT         | 1.00         | 0.60     |            |          | GG              | -0.19        | 0.95     |
|            |          | CC              |              |          |            |          | TT              | 0.57         | 0.81     |
|            |          | AA              | -1.87        | 0.51     |            |          | CT              | reference    |          |
|            |          | GG              | -1.42        | 0.51     |            |          | overall         |              | 0.96     |
| rs1481031  | 98       | AG              | reference    |          | rs7236090  | 96       | CC & CT         | -0.63        | 0.78     |
|            |          | overall         |              | 0.73     |            |          | TT              |              |          |
|            |          | AA & AG         | 0.87         | 0.66     |            |          | CC              | -5.83        | 0.01*    |
|            |          | GG              |              |          |            |          | TT              | -0.11        | 0.96     |
|            |          | AA              | -0.35        | 0.87     |            |          | CT              | reference    |          |
| rs17756073 | 96       | GG & AG         | 1.51         | 0.45     | rs8083946  | 99       | overall         |              | 0.92     |
|            |          | AA              |              |          |            |          | AA & AG         | 0.25         | 0.90     |
|            |          | AA              | -3.53        | 0.09*    |            |          | GG              |              |          |
|            |          | GG              | -1.92        | 0.53     |            |          | AG              | reference    |          |
|            |          | AG              | reference    |          |            |          | overall         |              | 0.92     |
| rs17759659 | 99       | overall         |              | 0.24     | rs899968   | 98       | AA & AG         | 0.25         | 0.90     |
|            |          | GG & AG         | 3.07         | 0.12*    |            |          | AA              |              |          |
|            |          | AA              |              |          |            |          | CC              | -3.37        | 0.25     |
|            |          | AA              | -0.20        | 0.92     |            |          | AC              | -1.78        | 0.39     |
|            |          | GG              | 6.19         | 0.03*    |            |          | overall         |              | 0.44     |
| rs1801018  | 99       | AG              | reference    |          | rs949037   | 97       | AA & AC         | 1.03         | 0.60     |
|            |          | overall         |              | 0.05*    |            |          | CC              |              |          |
|            |          | GG & AG         | 1.75         | 0.37     |            |          | TT              | -0.93        | 0.71     |
|            |          | AA              |              |          |            |          | CT              | 0.92         | 0.68     |
|            |          | AA              | 1.17         | 0.62     |            |          | overall         |              | 0.77     |
| rs1944419  | 97       | GG              | -0.10        | 0.97     |            |          | CC & CT         | -1.26        | 0.54     |
|            |          | AG              | reference    |          |            |          | TT              |              |          |
|            |          | overall         |              | 0.85     |            |          |                 |              |          |
|            |          | AA & AG         | 0.57         | 0.78     |            |          |                 |              |          |
|            |          | GG              |              |          |            |          |                 |              |          |
|            |          | AA              | 3.22         | 0.18*    |            |          |                 |              |          |
|            |          | TT              | -2.72        | 0.26     |            |          |                 |              |          |
|            |          | AT              | reference    |          |            |          |                 |              |          |
|            |          | overall         |              | 0.11*    |            |          |                 |              |          |
|            |          | TT & AT         | -4.05        | 0.08*    |            |          |                 |              |          |
|            |          | AA              |              |          |            |          |                 |              |          |
|            |          | AA & AT         | 3.71         | 0.11*    |            |          |                 |              |          |
|            |          | TT              |              |          |            |          |                 |              |          |

\* $p \leq 0.2$  preliminary analyses criterion.  
 Overall =  $p$  for type 3 test.  
 NRS-R, Neurobehavioral Rating Scale-Revised; tSNP, tagging single nucleotide polymorphism.

(continued)
